# Supplementary material for: Polymer-directed crystallization of HMX to construct nano-/microstructured aggregates with tunable polymorph and microstructure
Source: Royal Society of Chemistry journal article supplement (doi:10.1039/d1ce01428e), 2021-12-01
Supplement: d1ce01428e1.pdf [file d1ce01428e1.pdf]

## Supporting information for

# Polymer-directed Crystallization of HMX to Construct Nano-/Microstructured Aggregates with Tunable Polymorph and Microstructure

Xin Zhou<sup>a</sup>, Yan Ren<sup>b</sup>, Hongzhen Li<sup>a\*</sup>, Xiaoqing Zhou<sup>a</sup>, Shilong Hao<sup>a</sup>,  
Rong Xu<sup>a</sup>, Qi Zhang<sup>a</sup>

<sup>a</sup>*Institute of Chemical Materials, CAEP, Mianyang, Sichuan, 621999, China*

<sup>b</sup>*Mianyang City College, Mianyang, Sichuan, 621000, China*

Table S1 Crystal structure information of the HMX polymorphs

| Sample        | Conformation | Space group | Z | $\rho_{\text{meas.}}$ (g/cm <sup>3</sup> ) |
|---------------|--------------|-------------|---|--------------------------------------------|
| $\delta$ -HMX | boat-boat    | $P6_1$      | 6 | 1.80 <sup>a</sup>                          |
| $\gamma$ -HMX | boat-boat    | $Pc$        | 4 | 1.76 <sup>a</sup>                          |

Note: <sup>a</sup> data collected from reference (Miller, G. R et al, *Review of the Crystal Structures of Common Explosives. Part 1: RDX, HMX, TNT, PETN, and Teteryl*)

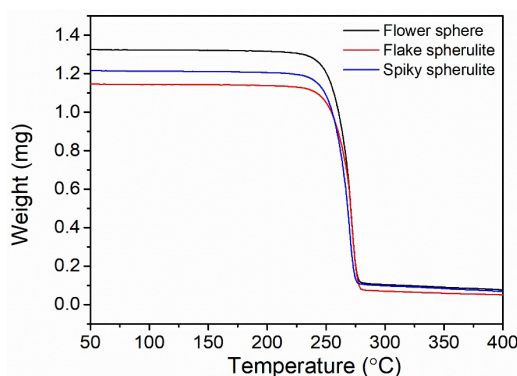

Figure S1 TG-curves of the sphere aggregates

Table S2 HPLC results of the aggregates

| Sample           | PVP (wt.%) | HMX (wt.%) |
|------------------|------------|------------|
| Flower sphere    | 6.8        | 93.2       |
| Spiky spherulite | 6.6        | 93.4       |
| Spiky spherulite | 8.1        | 91.9       |

The critical drop height with 50% explosion probability ( $H_{50}$ ) was determined according to GJB-772A-97 standard method 601.2. Specifically, the sample (30 mg for each test) was tested 25 times to obtain  $H_{50}$ , which represents the height from which dropping a 2.5 kg weight will result in a 50% explosive event of the trials. We found that the spiky spherulite'  $H_{50}$  was 90.0 cm. The impact energy was then calculated as 22 J based on equation

$$E=mgH_{50}$$

where  $m$  is the hammer weight,  $g$  is the gravity constant. Then we compared this data with needle  $\gamma$ -HMX in a previous report (*Xiaolan Song et al, Journal of Hazardous Materials 2008, 159, 222-229*) and the results are listed in Table 1.

Table S3 Comparison of the mechanical sensitivity

| Sample               | Impact energy with 50% explosion probability | IS  | FS   |
|----------------------|----------------------------------------------|-----|------|
| Needle $\gamma$ -HMX | 8.4 J                                        | 82% | 100% |
| Spiky spherulite     | 22.1 J                                       | 20% | 60%  |

Clearly, spherulitic structuring of the  $\gamma$ -HMX significantly increases the impact energy by almost 3-fold, which demonstrates the excellent desensitizing capability of our strategy.
